# Supplementary material
Source: PubMed Central journal article supplement (PMC5731243)
Supplement: NIHMS917757-supplement-3.pdf [file NIHMS917757-supplement-3.pdf]

Supplemental Table 3

(a) BWA/Novoalign - CREST Structural Variant Detection Summary

| SV Name               | SubjectID | Alignment | chrA  | PosA        | chrB     | PosB        | chrB   | PosB                | chrB       | SVType   | Type | ConsensusSeq | InsSeq | GeneA  | GeneA_Region | GeneA_Strand | GeneB     | GeneB_Region | GeneB_Strand | AffectedGenes_Region | FusionPrediction_Directional | SV ID  |
|-----------------------|-----------|-----------|-------|-------------|----------|-------------|--------|---------------------|------------|----------|------|--------------|--------|--------|--------------|--------------|-----------|--------------|--------------|----------------------|------------------------------|--------|
| ALK-intergenic_Y31    | Y31       | nva       | chr2  | 29933399 +  | 6 chr8   | 125204959 + | 2 CTX  | AAACATC(GTGTG       | ALK        | intronic | -    |              |        | ALK    | intronic     | -            | EZR       | intergenic   | -            | intronic             | NA                           | 8 42   |
| EZR->ROS1_Y35         | Y35       | bwa       | chr6  | 117647330 + | 0 chr6   | 159191320 + | 7 DEL  | TATCTATTT           | ROS1       | intronic | -    |              |        | ROS1   | intronic     | -            | EZR       | intronic     | -            | exonic               | EZR->ROS1                    | 7 23   |
| EZR->ROS1_Y35         | Y35       | nva       | chr6  | 117647330 + | 0 chr6   | 159191320 + | 10 DEL | TATCTATTT           | ROS1       | intronic | -    |              |        | ROS1   | intronic     | -            | EZR       | intronic     | -            | exonic               | EZR->ROS1                    | 10 23  |
| <-EZR:MYO18B->_Y35    | Y35       | nva       | chr6  | 159191349 + | 10 chr22 | 26237362 +  | 3 CTX  | AGCCGCCG            | EZR        | intronic | -    |              |        | EZR    | intronic     | -            | MYO18B    | intronic     | +            | intronic             | <-EZR:MYO18B->               | 13 35  |
| <-EZR:MYO18B->_Y35    | Y35       | bwa       | chr6  | 159191350 + | 8 chr22  | 26237364 +  | 0 CTX  | AGCCGCCA            | EZR        | intronic | -    |              |        | EZR    | intronic     | -            | MYO18B    | intronic     | +            | intronic             | <-EZR:MYO18B->               | 8 35   |
| <-ROS1:GJA1->_Y35     | Y35       | bwa       | chr6  | 117647551 + | 20 chr6  | 121757164 + | 4 DEL  | ACTCTGA/G           | ROS1       | exonic   | -    |              |        | ROS1   | exonic       | -            | GJA1      | intronic     | +            | exonic               | <-ROS1:GJA1->                | 24 40  |
| <-ROS1:GJA1->_Y35     | Y35       | nva       | chr6  | 117647551 + | 23 chr6  | 121757164 + | 3 DEL  | CTACTCTG            | ROS1       | exonic   | -    |              |        | ROS1   | exonic       | -            | GJA1      | intronic     | +            | exonic               | <-ROS1:GJA1->                | 26 40  |
| <-ROS1:ALKBH3->_Y65   | Y65       | nva       | chr6  | 117681462 + | 5 chr11  | 43917845 +  | 0 CTX  | TTGGGGT A           | ROS1       | intronic | -    |              |        | ROS1   | intronic     | -            | ALKBH3    | intronic     | +            | intronic             | <-ROS1:ALKBH3->              | 5 36   |
| <-ROS1:ALKBH3->_Y65   | Y65       | bwa       | chr6  | 117681462 + | 7 chr11  | 43917845 +  | 0 CTX  | GGTCAAA A           | ROS1       | intronic | -    |              |        | ROS1   | intronic     | -            | ALKBH3    | intronic     | +            | intronic             | <-ROS1:ALKBH3->              | 7 36   |
| SND1->BRAF_Y69        | Y69       | nva       | chr7  | 127347704 + | 5 chr7   | 140550011 - | 1 ITX  | GAGAGGT             | SND1       | intronic | +    |              |        | SND1   | intronic     | +            | BRAF      | exonic       | -            | exonic               | SND1->BRAF                   | 6 22   |
| SND1->BRAF_Y69        | Y69       | nva       | chr7  | 140550014 + | 4 chr7   | 127347704 - | 5 ITX  | GAGAGGT             | BRAF       | intronic | -    |              |        | BRAF   | intronic     | -            | SND1      | intronic     | +            | intronic             | SND1->BRAF                   | 9 22   |
| ALK->SMURF2_Y69       | Y69       | bwa       | chr17 | 62609797 +  | 0 chr2   | 29519589 +  | 9 CTX  | CTTCATGCG           | SMURF2     | intronic | -    |              |        | SMURF2 | intronic     | -            | ALK       | intronic     | -            | intronic             | ALK->SMURF2                  | 9 27   |
| ALK->SMURF2_Y69       | Y69       | nva       | chr17 | 62609797 +  | 0 chr2   | 29519589 +  | 14 CTX | CTTCATGCG           | SMURF2     | intronic | -    |              |        | SMURF2 | intronic     | -            | ALK       | intronic     | -            | intronic             | ALK->SMURF2                  | 14 27  |
| CD74->ROS1_Y73        | Y73       | nva       | chr6  | 117646510 + | 3 chr5   | 149783549 + | 17 CTX | AGGATGA TAA         | ROS1       | intronic | -    |              |        | ROS1   | intronic     | -            | CD74      | intronic     | -            | intronic             | CD74->ROS1                   | 20 20  |
| CD74->ROS1_Y73        | Y73       | bwa       | chr6  | 117646512 + | 34 chr5  | 149783549 + | 6 CTX  | AAGTCTTA            | ROS1       | intronic | -    |              |        | ROS1   | intronic     | -            | CD74      | intronic     | -            | intronic             | CD74->ROS1                   | 40 20  |
| <-ALK:DKK2->_Y73      | Y73       | nva       | chr2  | 29893372 +  | 3 chr4   | 107904603 - | 1 CTX  | TGTTATTT            | ALK        | intronic | -    |              |        | ALK    | intronic     | -            | DKK2      | intronic     | -            | intronic             | <-ALK:DKK2->                 | 4 33   |
| ARID1B->EZR_Y77       | Y77       | nva       | chr6  | 159235592 + | 4 chr6   | 157217685 - | 2 ITX  | CCAGGTA             | EZR        | intronic | -    |              |        | EZR    | intronic     | -            | ARID1B    | intronic     | +            | intronic             | ARID1B->EZR                  | 6 29   |
| <-TERT:CDH4->_Y79     | Y79       | nva       | chr5  | 1285136 +   | 19 chr20 | 60098818 +  | 22 CTX | TCACCGC T           | TERT       | intronic | -    |              |        | TERT   | intronic     | -            | CDH4      | intronic     | +            | intronic             | <-TERT:CDH4->                | 41 37  |
| <-TERT:CDH4->_Y79     | Y79       | bwa       | chr5  | 1285137 +   | 5 chr20  | 60098818 +  | 6 CTX  | GCAGGGCT            | TERT       | intronic | -    |              |        | TERT   | intronic     | -            | CDH4      | intronic     | +            | intronic             | <-TERT:CDH4->                | 11 37  |
| <-TERT:CDH4->_Y79     | Y79       | bwa       | chr5  | 1285258 +   | 38 chr20 | 60098818 +  | 6 CTX  | CCGCGGT             | TERT       | intronic | -    |              |        | TERT   | intronic     | -            | CDH4      | intronic     | +            | intronic             | <-TERT:CDH4->                | 44 37  |
| BRAF->SMA4_Y79        | Y79       | nva       | chr5  | 69485663 +  | 1 chr7   | 140611466 + | 3 CTX  | TACAATA/ T          | SMA4       | intronic | -    |              |        | SMA4   | intronic     | -            | BRAF      | intronic     | -            | intronic             | BRAF->SMA4                   | 4 39   |
| EML4->BIRC6_891A      | 891A      | bwa       | chr2  | 42494473 +  | 105 chr2 | 32820090 +  | 19 INS | TGAATTTCT           | EML4       | intronic | +    |              |        | EML4   | intronic     | +            | BIRC6     | intronic     | +            | exonic               | EML4->BIRC6                  | 124 24 |
| EML4->BIRC6_891A      | 891A      | nva       | chr2  | 42494473 +  | 133 chr2 | 32820090 +  | 27 INS | ATATGAAIT           | EML4       | intronic | +    |              |        | EML4   | intronic     | +            | BIRC6     | intronic     | +            | exonic               | EML4->BIRC6                  | 160 24 |
| AAK1->ALK_891A        | 891A      | nva       | chr2  | 29453351 +  | 33 chr2  | 69799477 +  | 24 DEL | ACCCTTTCTG          | ALK        | intronic | -    |              |        | ALK    | intronic     | -            | AAK1      | intronic     | -            | exonic               | AAK1->ALK                    | 57 25  |
| AAK1->ALK_891A        | 891A      | bwa       | chr2  | 29453372 +  | 82 chr2  | 69799477 +  | 12 DEL | CAGCAGA TGAGGCCAG   | ALK        | intronic | -    |              |        | ALK    | intronic     | -            | AAK1      | intronic     | -            | exonic               | AAK1->ALK                    | 94 25  |
| HIP1->ALK_Y02         | Y02       | nva       | chr2  | 29446894 +  | 12 chr7  | 75184556 +  | 8 CTX  | AACCCCAI T          | ALK        | intronic | -    |              |        | ALK    | intronic     | -            | HIP1      | intronic     | -            | intronic             | HIP1->ALK                    | 20 21  |
| HIP1->ALK_Y02         | Y02       | bwa       | chr2  | 29446898 +  | 15 chr7  | 75184556 +  | 1 CTX  | CGTGAAC C           | ALK        | intronic | -    |              |        | ALK    | intronic     | -            | HIP1      | intronic     | -            | intronic             | HIP1->ALK                    | 16 21  |
| ALK->TBC1D4_Y02       | Y02       | bwa       | chr13 | 75923056 +  | 0 chr2   | 29872084 +  | 8 CTX  | AATACCTIG           | TBC1D4     | intronic | -    |              |        | TBC1D4 | intronic     | -            | ALK       | intronic     | -            | intronic             | ALK->TBC1D4                  | 8 28   |
| ALK->TBC1D4_Y02       | Y02       | nva       | chr13 | 75923056 +  | 0 chr2   | 29872084 +  | 12 CTX | AATACCTIG           | TBC1D4     | intronic | -    |              |        | TBC1D4 | intronic     | -            | ALK       | intronic     | -            | intronic             | ALK->TBC1D4                  | 12 28  |
| EML4->ALK_Y04         | Y04       | nva       | chr2  | 42508107 +  | 11 chr2  | 29447605 -  | 1 ITX  | ATGTTTTATG          | EML4       | exonic   | +    |              |        | ALK    | intronic     | -            | ALK       | intronic     | -            | exonic               | EML4->ALK                    | 12 1   |
| EML4->ALK_Y04         | Y04       | nva       | chr2  | 29447607 +  | 6 chr2   | 42508107 -  | 11 ITX | ATGTTTTATA          | ALK        | intronic | -    |              |        | ALK    | intronic     | -            | EML4      | exonic       | +            | exonic               | EML4->ALK                    | 17 1   |
| EML4->ALK_Y04         | Y04       | bwa       | chr2  | 29447608 +  | 21 chr2  | 42508108 -  | 21 ITX | GCGCGGT             | ALK        | intronic | -    |              |        | ALK    | intronic     | -            | EML4      | exonic       | +            | exonic               | EML4->ALK                    | 42 1   |
| EML4->ALK_Y04         | Y04       | bwa       | chr2  | 42508108 +  | 21 chr2  | 29447608 -  | 21 ITX | AATGGACI            | EML4       | exonic   | +    |              |        | ALK    | intronic     | -            | ALK       | intronic     | -            | exonic               | EML4->ALK                    | 42 1   |
| ALK->EML4_Y05         | Y05       | bwa       | chr2  | 29446771 -  | 11 chr2  | 42496486 +  | 4 ITX  | AGGATAG AA          | ALK        | intronic | +    |              |        | ALK    | intronic     | +            | EML4      | intronic     | +            | intronic             | ALK->EML4                    | 15 14  |
| ALK->EML4_Y05         | Y05       | nva       | chr2  | 29446771 -  | 22 chr2  | 42496486 +  | 7 ITX  | AGGATAG AA          | ALK        | intronic | +    |              |        | ALK    | intronic     | +            | EML4      | intronic     | +            | intronic             | ALK->EML4                    | 29 14  |
| ALK->EML4_Y05         | Y05       | bwa       | chr2  | 42496486 -  | 4 chr2   | 29446771 +  | 11 ITX | AGGATAG AA          | EML4       | intronic | +    |              |        | ALK    | intronic     | +            | ALK       | intronic     | -            | intronic             | ALK->EML4                    | 15 14  |
| ALK->EML4_Y05         | Y05       | nva       | chr2  | 42496486 -  | 7 chr2   | 29446771 +  | 22 ITX | AGGATAG AA          | EML4       | intronic | +    |              |        | ALK    | intronic     | +            | ALK       | intronic     | -            | intronic             | ALK->EML4                    | 29 14  |
| <-ALK:EML4->_Y05      | Y05       | nva       | chr2  | 29446766 +  | 11 chr2  | 42495791 +  | 11 DEL | AGCAGAC G           | ALK        | intronic | -    |              |        | ALK    | intronic     | -            | EML4      | intronic     | +            | intronic             | <-ALK:EML4->                 | 22 19  |
| <-ALK:EML4->_Y05      | Y05       | nva       | chr2  | 29446766 +  | 11 chr2  | 42495791 +  | 11 DEL | AGCAGAC T           | ALK        | intronic | -    |              |        | ALK    | intronic     | -            | EML4      | intronic     | +            | exonic               | <-ALK:EML4->                 | 22 19  |
| <-ALK:EML4->_Y05      | Y05       | bwa       | chr2  | 29446769 +  | 14 chr2  | 42495787 +  | 10 DEL | AGCAGAC AGGCT       | ALK        | intronic | -    |              |        | ALK    | intronic     | -            | EML4      | intronic     | +            | exonic               | <-ALK:EML4->                 | 24 19  |
| EML4->ALK_Y06         | Y06       | nva       | chr2  | 29447381 +  | 10 chr2  | 42523099 -  | 3 ITX  | ATGAATTC            | ALK        | intronic | -    |              |        | ALK    | intronic     | -            | EML4      | intronic     | +            | intronic             | EML4->ALK                    | 13 2   |
| ALK->EML4_Y06         | Y06       | bwa       | chr2  | 29447383 -  | 14 chr2  | 42523102 +  | 17 ITX | CATTTGGCCT          | ALK        | intronic | -    |              |        | ALK    | intronic     | -            | EML4      | intronic     | +            | intronic             | ALK->EML4                    | 31 15  |
| ALK->EML4_Y06         | Y06       | nva       | chr2  | 29447383 -  | 28 chr2  | 42523102 +  | 32 ITX | CTCATTTCTCT         | ALK        | intronic | -    |              |        | ALK    | intronic     | -            | EML4      | intronic     | +            | intronic             | ALK->EML4                    | 60 15  |
| ALK->EML4_Y06         | Y06       | bwa       | chr2  | 42523102 -  | 17 chr2  | 29447383 +  | 14 ITX | CATTTGGC/TA         | EML4       | intronic | +    |              |        | ALK    | intronic     | +            | ALK       | intronic     | -            | intronic             | ALK->EML4                    | 31 15  |
| AC009264.1->SND1_Y06  | Y06       | bwa       | chr7  | 136757814 - | 0 chr7   | 127615438 + | 5 ITX  | CCTTCTTCGTGTGTGTG   | AC009264.1 | intronic | -    |              |        | SND1   | intronic     | -            | SND1      | intronic     | +            | intronic             | AC009264.1->SND1             | 5 41   |
| AC009264.1->SND1_Y06  | Y06       | nva       | chr7  | 136757828 - | 0 chr7   | 127615478 + | 6 ITX  | CCTTCTTC/ TG        | AC009264.1 | intronic | -    |              |        | SND1   | intronic     | -            | SND1      | intronic     | +            | intronic             | AC009264.1->SND1             | 6 41   |
| EML4->ALK_Y07         | Y07       | bwa       | chr2  | 42525286 +  | 28 chr2  | 29448172 -  | 1 ITX  | ATTTGTAATCTTTTAAAGT | EML4       | intronic | +    |              |        | ALK    | intronic     | +            | ALK       | intronic     | +            | intronic             | EML4->ALK                    | 29 3   |
| EML4->ALK_Y07         | Y07       | nva       | chr2  | 29448174 +  | 5 chr2   | 42525284 -  | 3 ITX  | GCAGAA/ T           | ALK        | intronic | -    |              |        | ALK    | intronic     | -            | EML4      | intronic     | +            | intronic             | EML4->ALK                    | 8 3    |
| EML4->ALK_Y07         | Y07       | nva       | chr2  | 42525285 +  | 21 chr2  | 29448174 -  | 5 ITX  | AAATTTGT/ A         | EML4       | intronic | +    |              |        | ALK    | intronic     | +            | ALK       | intronic     | -            | intronic             | EML4->ALK                    | 26 3   |
| EML4->ALK_Y07         | Y07       | bwa       | chr2  | 29448176 +  | 28 chr2  | 42525286 -  | 28 ITX | ATTTGTA/ A          | ALK        | intronic | -    |              |        | ALK    | intronic     | -            | EML4      | intronic     | +            | intronic             | EML4->ALK                    | 56 3   |
| ATP10B-><-ALK_Y07     | Y07       | nva       | chr5  | 160040791 - | 0 chr2   | 29463347 +  | 28 CTX | ACTTAGG/ TA         | ATP10B     | intronic | -    |              |        | ATP10B | intronic     | -            | ALK       | intronic     | -            | intronic             | ATP10B-><-ALK                | 28 32  |
| ATP10B-><-ALK_Y07     | Y07       | bwa       | chr5  | 160040791 - | 1 chr2   | 29463347 +  | 15 CTX | GAAAAGC TA          | ATP10B     | intronic | -    |              |        | ATP10B | intronic     | -            | ALK       | intronic     | -            | intronic             | ATP10B-><-ALK                | 16 32  |
| <-ALK:LINC00299->_Y07 | Y07       | nva       | chr2  | 30067378 +  | 3 chr2   | 8234554 -   | 4 ITX  | TCAAGAC/            | ALK        | intronic | -    |              |        | ALK    | intronic     | -            | LINC00299 | intronic     | -            | intronic             | <-ALK:LINC00299->            | 7 38   |
| <-ALK:LINC00299->_Y07 | Y07       | bwa       | chr2  | 30067380 +  | 17 chr2  | 8234562 -   | 7 ITX  | CAACAGG             | ALK        | intronic | -    |              |        | ALK    | intronic     | -            | LINC00299 | intronic     | -            | intronic             | <-ALK:LINC00299->            | 24 38  |
| EML4->ALK_Y08         | Y08       | nva       | chr2  | 29447445 +  | 22 chr2  | 42499308 -  | 3 ITX  | ACTTAA/ T           | ALK        | intronic | -    |              |        | ALK    | intronic     | -            | EML4      | intronic     | +            | intronic             | EML4->ALK                    | 25 4   |

Supplemental Table 3

(a) BWA/Novoalign - CREST Structural Variant Detection Summary

| SV Name          | SubjectID | Alignment | chrA | PosA       | oriA | SClipA  | chrB       | PosB   | oriB              | SClipB | Type     | ConsensusSeq | InsSeq | GeneA    | GeneA_Region | GeneA_Strand | GeneB    | GeneB_Region | GeneB_Strand | AffectedGenes_Region | FusionPrediction_Directional | Scip | SV ID |
|------------------|-----------|-----------|------|------------|------|---------|------------|--------|-------------------|--------|----------|--------------|--------|----------|--------------|--------------|----------|--------------|--------------|----------------------|------------------------------|------|-------|
| EML4->ALK_Y08    | Y08       | nva       | chr2 | 42499308 + |      | 3 chr2  | 29447445 - | 22 ITX | ACCATTA1G         | EML4   | intronic | +            | ALK    | intronic | +            | ALK          | intronic | -            | intronic     | EML4->ALK            | 25                           | 4    |       |
| ALK->EML4_Y08    | Y08       | bwa       | chr2 | 29447441 - |      | 16 chr2 | 42499310 + | 9 ITX  | CTATGCTTTC        | ALK    | intronic | -            | EML4   | intronic | -            | EML4         | intronic | +            | intronic     | ALK->EML4            | 25                           | 16   |       |
| ALK->EML4_Y08    | Y08       | bwa       | chr2 | 42499310 - |      | 9 chr2  | 29447441 + | 16 ITX | CTATGCTTCA        | EML4   | intronic | +            | ALK    | intronic | +            | ALK          | intronic | -            | intronic     | ALK->EML4            | 25                           | 16   |       |
| EML4->ALK_Y12    | Y12       | nva       | chr2 | 42524069 + |      | 7 chr2  | 29446831 - | 1 ITX  | CAGATGC           | EML4   | intronic | +            | ALK    | intronic | +            | ALK          | intronic | -            | intronic     | EML4->ALK            | 8                            | 5    |       |
| EML4->ALK_Y12    | Y12       | bwa       | chr2 | 29446833 + |      | 5 chr2  | 42524070 - | 5 ITX  | CAGATGC           | ALK    | intronic | -            | EML4   | intronic | -            | EML4         | intronic | +            | intronic     | EML4->ALK            | 10                           | 5    |       |
| EML4->ALK_Y12    | Y12       | nva       | chr2 | 29446833 + |      | 6 chr2  | 42524069 - | 7 ITX  | CAGATGC           | ALK    | intronic | -            | EML4   | intronic | +            | ALK          | intronic | +            | intronic     | EML4->ALK            | 13                           | 5    |       |
| EML4->ALK_Y12    | Y12       | bwa       | chr2 | 42524070 + |      | 5 chr2  | 29446833 - | 5 ITX  | TGGGGAGGGAGCCAGG  | EML4   | intronic | +            | ALK    | intronic | +            | ALK          | intronic | -            | intronic     | EML4->ALK            | 10                           | 5    |       |
| EML4->ALK_Y15    | Y15       | nva       | chr2 | 29447216 + |      | 4 chr2  | 42498634 - | 1 ITX  | TGGGGAT A         | ALK    | intronic | -            | EML4   | intronic | -            | EML4         | intronic | +            | intronic     | EML4->ALK            | 5                            | 6    |       |
| EML4->ALK_Y15    | Y15       | bwa       | chr2 | 29447216 + |      | 4 chr2  | 42498635 - | 2 ITX  | CTGTGCTA          | ALK    | intronic | -            | EML4   | intronic | +            | ALK          | intronic | +            | intronic     | EML4->ALK            | 6                            | 6    |       |
| EML4->ALK_Y15    | Y15       | nva       | chr2 | 42498635 + |      | 9 chr2  | 29447216 - | 4 ITX  | TTTCTCTGTTGGAGATT | EML4   | intronic | +            | ALK    | intronic | +            | ALK          | intronic | -            | intronic     | EML4->ALK            | 13                           | 6    |       |
| EML4->ALK_Y18    | Y18       | bwa       | chr2 | 29447564 + |      | 29 chr2 | 42530299 - | 13 ITX | GGGCCAAA          | ALK    | intronic | -            | EML4   | intronic | -            | EML4         | exonic   | +            | exonic       | EML4->ALK            | 42                           | 7    |       |
| EML4->ALK_Y18    | Y18       | nva       | chr2 | 29447564 + |      | 51 chr2 | 42530299 - | 36 ITX | GCCAGGC           | ALK    | intronic | -            | EML4   | intronic | -            | EML4         | exonic   | +            | exonic       | EML4->ALK            | 87                           | 7    |       |
| EML4->ALK_Y18    | Y18       | bwa       | chr2 | 42530299 + |      | 13 chr2 | 29447564 - | 29 ITX | GGGCCAAA          | EML4   | exonic   | +            | ALK    | intronic | +            | ALK          | intronic | -            | exonic       | EML4->ALK            | 42                           | 7    |       |
| EML4->ALK_Y18    | Y18       | nva       | chr2 | 42530299 + |      | 36 chr2 | 29447564 - | 51 ITX | GCCAGGC           | EML4   | exonic   | +            | ALK    | intronic | -            | ALK          | intronic | -            | exonic       | EML4->ALK            | 87                           | 7    |       |
| ALK->EML4_Y18    | Y18       | bwa       | chr2 | 29447475 - |      | 23 chr2 | 42530756 + | 8 ITX  | CAAAGTG/GA        | ALK    | intronic | -            | EML4   | intronic | +            | ALK          | intronic | +            | intronic     | ALK->EML4            | 31                           | 17   |       |
| ALK->EML4_Y18    | Y18       | nva       | chr2 | 29447475 - |      | 52 chr2 | 42530756 + | 6 ITX  | CCTTGTG/GA        | ALK    | intronic | -            | EML4   | intronic | -            | EML4         | intronic | +            | intronic     | ALK->EML4            | 58                           | 17   |       |
| ALK->EML4_Y18    | Y18       | nva       | chr2 | 42530756 - |      | 6 chr2  | 29447475 + | 52 ITX | CCTTGTG/GA        | EML4   | intronic | +            | ALK    | intronic | +            | ALK          | intronic | -            | intronic     | ALK->EML4            | 58                           | 17   |       |
| ALK->EML4_Y18    | Y18       | bwa       | chr2 | 42530756 - |      | 8 chr2  | 29447475 + | 23 ITX | CAAAGTG/GA        | EML4   | intronic | +            | ALK    | intronic | +            | ALK          | intronic | -            | intronic     | ALK->EML4            | 31                           | 17   |       |
| EML4->ALK_Y22    | Y22       | nva       | chr2 | 42477480 + |      | 15 chr2 | 29447604 - | 4 ITX  | AAAGGCA           | EML4   | intronic | +            | ALK    | intronic | +            | ALK          | intronic | -            | intronic     | EML4->ALK            | 19                           | 8    |       |
| EML4->ALK_Y22    | Y22       | bwa       | chr2 | 29447606 + |      | 10 chr2 | 42477480 - | 8 ITX  | TATGCAA1          | ALK    | intronic | -            | EML4   | intronic | -            | EML4         | intronic | +            | intronic     | EML4->ALK            | 18                           | 8    |       |
| EML4->ALK_Y22    | Y22       | nva       | chr2 | 29447606 + |      | 13 chr2 | 29447606 - | 1 ITX  | CTATGCA/          | ALK    | intronic | -            | EML4   | intronic | -            | EML4         | intronic | +            | intronic     | EML4->ALK            | 14                           | 8    |       |
| EML4->ALK_Y22    | Y22       | bwa       | chr2 | 42477480 + |      | 8 chr2  | 29447606 - | 10 ITX | TATGCAATGGACCGACC | EML4   | intronic | +            | ALK    | intronic | +            | ALK          | intronic | -            | intronic     | EML4->ALK            | 18                           | 8    |       |
| ALK->SETD2_Y22   | Y22       | bwa       | chr3 | 47122359 + |      | 0 chr2  | 29447607 + | 10 CTX | TTTCTCTCT         | SETD2  | intronic | -            | ALK    | intronic | -            | ALK          | intronic | -            | intronic     | ALK->SETD2           | 10                           | 26   |       |
| ALK->SETD2_Y22   | Y22       | nva       | chr3 | 47122359 + |      | 0 chr2  | 29447607 + | 10 CTX | TTTCCCGT          | SETD2  | intronic | -            | ALK    | intronic | -            | ALK          | intronic | -            | intronic     | ALK->SETD2           | 10                           | 26   |       |
| EML4->ALK_Y26    | Y26       | nva       | chr2 | 42498515 + |      | 4 chr2  | 29448356 - | 2 ITX  | TATTTTTA GGGT     | EML4   | intronic | +            | ALK    | intronic | +            | ALK          | exonic   | -            | exonic       | EML4->ALK            | 6                            | 9    |       |
| EML4->ALK_Y26    | Y26       | bwa       | chr2 | 29448357 + |      | 18 chr2 | 42498517 - | 17 ITX | GCCTGAG AC        | ALK    | exonic   | -            | EML4   | intronic | +            | ALK          | intronic | +            | exonic       | EML4->ALK            | 35                           | 9    |       |
| EML4->ALK_Y26    | Y26       | nva       | chr2 | 29448357 + |      | 39 chr2 | 42498515 - | 4 ITX  | CACAGCC AC        | ALK    | exonic   | -            | EML4   | intronic | +            | ALK          | intronic | +            | exonic       | EML4->ALK            | 43                           | 9    |       |
| EML4->ALK_Y26    | Y26       | bwa       | chr2 | 42498517 + |      | 17 chr2 | 29448357 - | 18 ITX | GCCTGAG AC        | EML4   | intronic | +            | ALK    | intronic | +            | ALK          | exonic   | -            | exonic       | EML4->ALK            | 35                           | 9    |       |
| EML4->ALK_Y27    | Y27       | nva       | chr2 | 42502145 + |      | 11 chr2 | 29447467 - | 7 ITX  | CACCTCTTCCAAAGATA | EML4   | intronic | +            | ALK    | intronic | +            | ALK          | intronic | -            | intronic     | EML4->ALK            | 18                           | 10   |       |
| EML4->ALK_Y27    | Y27       | bwa       | chr2 | 42502145 + |      | 15 chr2 | 29447468 - | 8 ITX  | AAAGATAGTAGAGCAGA | EML4   | intronic | +            | ALK    | intronic | +            | ALK          | intronic | -            | intronic     | EML4->ALK            | 23                           | 10   |       |
| ITPR1->ALK_Y27   | Y27       | nva       | chr2 | 29991266 + |      | 6 chr3  | 4659472 -  | 4 CTX  | GGTAATT/          | ALK    | intronic | -            | ITPR1  | intronic | -            | ITPR1        | intronic | +            | intronic     | ITPR1->ALK           | 10                           | 30   |       |
| EML4->ALK_Y52    | Y52       | nva       | chr2 | 42494477 + |      | 5 chr2  | 29448192 - | 2 ITX  | TTGTATTAT         | EML4   | intronic | +            | ALK    | intronic | +            | ALK          | intronic | -            | intronic     | EML4->ALK            | 7                            | 11   |       |
| EML4->ALK_Y52    | Y52       | bwa       | chr2 | 42494478 + |      | 27 chr2 | 29448192 - | 1 ITX  | GGCAGTAAACCTTGCA  | EML4   | intronic | +            | ALK    | intronic | +            | ALK          | intronic | -            | intronic     | EML4->ALK            | 28                           | 11   |       |
| ALK->EML4_Y52    | Y52       | bwa       | chr2 | 42494496 - |      | 6 chr2  | 29448203 + | 15 ITX | AAATTAATAA        | EML4   | intronic | +            | ALK    | intronic | +            | ALK          | intronic | -            | intronic     | ALK->EML4            | 21                           | 18   |       |
| ALK->EML4_Y52    | Y52       | nva       | chr2 | 42494496 - |      | 14 chr2 | 29448203 + | 27 ITX | AAATTAATAA        | EML4   | intronic | +            | ALK    | intronic | +            | ALK          | intronic | -            | intronic     | ALK->EML4            | 41                           | 18   |       |
| EML4->ALK_Y59    | Y59       | nva       | chr2 | 29446932 + |      | 14 chr2 | 42522793 - | 1 ITX  | CACCCGTG C        | ALK    | intronic | -            | EML4   | intronic | +            | ALK          | intronic | +            | intronic     | EML4->ALK            | 15                           | 12   |       |
| EML4->ALK_Y59    | Y59       | bwa       | chr2 | 29446932 + |      | 17 chr2 | 42522797 - | 10 ITX | GTGCCATC          | ALK    | intronic | -            | EML4   | intronic | -            | EML4         | intronic | +            | intronic     | EML4->ALK            | 27                           | 12   |       |
| EML4->ALK_Y59    | Y59       | nva       | chr2 | 42522794 + |      | 16 chr2 | 29446932 - | 14 ITX | AGTACTC G         | EML4   | intronic | +            | ALK    | intronic | +            | ALK          | intronic | -            | intronic     | EML4->ALK            | 30                           | 12   |       |
| EML4->ALK_Y59    | Y59       | bwa       | chr2 | 42522797 + |      | 10 chr2 | 29446932 - | 17 ITX | GTGCCATGGAGCCTAAC | EML4   | intronic | +            | ALK    | intronic | +            | ALK          | intronic | -            | intronic     | EML4->ALK            | 27                           | 12   |       |
| ADCY3-><-ALK_Y59 | Y59       | bwa       | chr2 | 25105528 - |      | 1 chr2  | 29452623 + | 5 ITX  | AATTTTAT AC       | ADCY3  | intronic | -            | ALK    | intronic | -            | ALK          | intronic | -            | intronic     | ADCY3-><-ALK         | 6                            | 31   |       |
| ADCY3-><-ALK_Y59 | Y59       | nva       | chr2 | 25105528 - |      | 1 chr2  | 29452623 + | 11 ITX | CCTTGAGIAC        | ADCY3  | intronic | -            | ALK    | intronic | -            | ALK          | intronic | -            | intronic     | ADCY3-><-ALK         | 12                           | 31   |       |
| EML4->ALK_Y61    | Y61       | bwa       | chr2 | 29448680 + |      | 36 chr2 | 42525754 - | 43 ITX | ACAGGTA.GGGGCTCTG | ALK    | intronic | +            | EML4   | intronic | +            | EML4         | intronic | +            | intronic     | EML4->ALK            | 79                           | 13   |       |
| EML4->ALK_Y61    | Y61       | bwa       | chr2 | 42525754 + |      | 43 chr2 | 29448680 + | 36 ITX | ACAGGTA.GGGGCTCTG | EML4   | intronic | +            | ALK    | intronic | +            | ALK          | intronic | -            | intronic     | EML4->ALK            | 79                           | 13   |       |
| <-ALK:MTA3->_Y61 | Y61       | nva       | chr2 | 29575087 + |      | 4 chr2  | 42807780 + | 4 DEL  | GTGCTACI A        | ALK    | intronic | -            | MTA3   | intronic | -            | MTA3         | intronic | +            | exonic       | <-ALK:MTA3->         | 8                            | 34   |       |
| <-ALK:MTA3->_Y61 | Y61       | bwa       | chr2 | 29575088 + |      | 20 chr2 | 42807782 + | 0 DEL  | CTACCGA T         | ALK    | intronic | -            | MTA3   | intronic | -            | MTA3         | intronic | +            | exonic       | <-ALK:MTA3->         | 20                           | 34   |       |
